# Supplementary material for: Transcatheter arterial embolization of nonvariceal gastrointestinal bleeding with n-butyl cyanoacrylate or coils: a systematic review and meta-analysis
Source: PubMed Central journal article supplement — Sci Rep. 2024 Nov 9;14:27377. doi: 10.1038/s41598-024-79133-4 (PMC11550831; doi:10.1038/s41598-024-79133-4), 2024-11-09

**Transcatheter arterial embolization of nonvariceal gastrointestinal  
bleeding with *n*-butyl cyanoacrylate or coils: A systematic review and  
meta-analysis**

**Authors:** Tomohiro Matsumoto<sup>1</sup>, Rika Yoshimatsu<sup>1,2</sup>, Junki Shibata<sup>1</sup>, Marina Osaki<sup>1,2</sup>, Hitomi Maeda<sup>1</sup>, Kana Miyatake<sup>1</sup>, Yoshinori Noda<sup>1</sup>, Tomoaki Yamanishi<sup>1</sup>, Yasutaka Baba<sup>3</sup>, Tomohiro Hirao<sup>4</sup>, Takuji Yamagami<sup>1</sup>

**Affiliations:** <sup>1</sup> Department of Diagnostic and Interventional Radiology, Kochi Medical School, Kochi University, Oko-Cho, Kohasu, Nankoku, Kochi 783-8505, Japan

<sup>2</sup> Department of Radiology, Kochi Health Sciences Center, 2125-1 Ike, Kochi 781-0111, Japan

<sup>3</sup> Department of Diagnostic Radiology, International Medical Centre, Saitama Medical University, 1397-1 Yamane, Hidaka, 350-1298, Japan

<sup>4</sup> Department of Public Health, Faculty of Medicine, Kagawa University, Kagawa, Japan.

\* Correspondence to Associate Professor Tomohiro Matsumoto, M.D., Ph.D.  
Associate Professor, Department of Diagnostic and Interventional Radiology, Kochi University, Kochi Medical School, Kohasu, Oko-cho, Nankoku, Kochi 783-8505, Japan.  
(ORCID ID <https://orcid.org/0000-0002-2375-4919>)

Tel: +81 888802367

FAX: +81 888802368

E-mail: [t-matsu@kochi-u.ac.jp](mailto:t-matsu@kochi-u.ac.jp)

---

### Supplement Table S1. Literature search.

a. Library Search Strategy: Cochrane Library.

| Search No | Search Strategy                                                                                                                                                                                                                                                                                                              |
|-----------|------------------------------------------------------------------------------------------------------------------------------------------------------------------------------------------------------------------------------------------------------------------------------------------------------------------------------|
| #1        | (GIB OR ((gastrointestinal OR esophageal OR oesophageal OR gastric OR duodenal OR gastroduodenal OR intestinal OR colonic OR rectal OR peptic) AND (bleed* OR re-bleed* OR rebleed* OR hemorrhag* OR haemorrhag* OR hematemes* OR haematemes* OR melena* OR melaena*))) AND (non-variceal OR nonvariceal OR arter*):ti,ab,kw |
| #2        | (embolization* OR embolisation* OR embolism* OR embolotherap*):ti,ab,kw                                                                                                                                                                                                                                                      |
| #3        | (NBCA OR "N-Butyl-Cyanoacrylate" OR "N-Butyl-2-Cyanoacrylate" OR *coil*):ti,ab,kw                                                                                                                                                                                                                                            |
| #4        | #1 AND #2 AND #3 AND english:la                                                                                                                                                                                                                                                                                              |
| #6        | #4 CDSR                                                                                                                                                                                                                                                                                                                      |

b. Library Search Strategy: PubMed.

| Search No | Search Strategy                                                                                                                                                                                                                                                                                                                                                                                                                                                                                                                              |
|-----------|----------------------------------------------------------------------------------------------------------------------------------------------------------------------------------------------------------------------------------------------------------------------------------------------------------------------------------------------------------------------------------------------------------------------------------------------------------------------------------------------------------------------------------------------|
| #01       | ("Gastrointestinal Hemorrhage"[MeSH] OR Hematemesis[MeSH] OR Melena[MeSH] OR GIB[TIAB] OR ((gastrointestinal[TIAB] OR esophageal[TIAB] OR oesophageal[TIAB] OR gastric[TIAB] OR duodenal[TIAB] OR gastroduodenal[TIAB] OR intestinal[TIAB] OR colonic[TIAB] OR rectal[TIAB] OR peptic[TIAB])) AND (bleed*[TIAB] OR "re-bleed"[TIAB] OR rebleed*[TIAB] OR hemorrhag*[TIAB] OR haemorrhag*[TIAB] OR hematemes*[TIAB] OR haematemes*[TIAB] OR melena*[TIAB] OR melaena*[TIAB])) AND ("non-variceal"[TIAB] OR nonvariceal[TIAB] OR arter*[TIAB]) |
| #02       | "Embolization, Therapeutic"[MeSH] OR embolization*[TIAB] OR embolisation*[TIAB] OR embolism*[TIAB] OR embolotherap*[TIAB]                                                                                                                                                                                                                                                                                                                                                                                                                    |
| #03       | Enbucrilate[MeSH] OR NBCA[TIAB] OR "N-Butyl-Cyanoacrylate"[TIAB] OR "N-Butyl-2-Cyanoacrylate"[TIAB] OR coil*[TIAB] OR microcoil*[TIAB]                                                                                                                                                                                                                                                                                                                                                                                                       |
| #04       | 2000/01:2023/08[DP] AND english[LA]                                                                                                                                                                                                                                                                                                                                                                                                                                                                                                          |
| #05       | #1 AND #2 AND #3 AND #4                                                                                                                                                                                                                                                                                                                                                                                                                                                                                                                      |
| #06       | #5 AND ("Meta-Analysis"[PT] OR "Meta-Analysis as Topic"[Mesh] OR "meta-analysis"[TIAB])                                                                                                                                                                                                                                                                                                                                                                                                                                                      |
| #07       | #5 AND ("Cochrane Database Syst Rev"[TA] OR "Systematic Review"[PT] OR "Systematic Reviews as Topic"[Mesh] OR "systematic review"[TIAB])                                                                                                                                                                                                                                                                                                                                                                                                     |
| #08       | #5 AND ("Practice Guideline"[PT] OR "Practice Guidelines as Topic"[Mesh] OR "Consensus"[Mesh] OR "Consensus Development Conferences as Topic"[Mesh] OR "Consensus Development Conference"[PT] OR guideline*[TI] OR consensus[TI])                                                                                                                                                                                                                                                                                                            |
| #09       | #6 OR #7 OR #8                                                                                                                                                                                                                                                                                                                                                                                                                                                                                                                               |
| #10       | #5 AND ("Randomized Controlled Trial"[PT] OR "Randomized Controlled Trials as Topic"[Mesh] OR (random*[TIAB] NOT medline[SB]))                                                                                                                                                                                                                                                                                                                                                                                                               |

|     |                                                                                                                                                                                                                                                                                                                                                                                                                                       |
|-----|---------------------------------------------------------------------------------------------------------------------------------------------------------------------------------------------------------------------------------------------------------------------------------------------------------------------------------------------------------------------------------------------------------------------------------------|
| #11 | #5 AND ("Clinical Trial"[PT] OR "Clinical Trials as Topic"[Mesh] OR "Observational Study"[PT] OR "Observational Studies as Topic"[Mesh] OR ((clinical trial*[TIAB] OR case control*[TIAB] OR case comparison*[TIAB]) NOT medline[SB]))                                                                                                                                                                                                |
| #12 | (#10 OR #11) NOT #9                                                                                                                                                                                                                                                                                                                                                                                                                   |
| #13 | #5 AND ("Epidemiologic Methods"[Mesh] OR "Comparative Study"[PT] OR "Multicenter Study"[PT] OR "Validation Study"[PT] OR (("survival analysis"[TIAB] OR cohort*[TIAB] OR "comparative stud*"[TIAB] OR "follow-up stud*"[TIAB] OR "prospective stud*"[TIAB] OR "Retrospective study*"[TIAB] OR sensitivit*[TIAB] OR specificit*[TIAB] OR "retrospective analytical stud*"[TIAB] OR "Retrospective Evaluation"[TIAB]) NOT medline[SB])) |
| #14 | #13 NOT (#9 OR #12)                                                                                                                                                                                                                                                                                                                                                                                                                   |

c. Library Search Strategy: Embase.

| No. | Query                                                                                                                                                                                                                                                                                                                                                                                                                |
|-----|----------------------------------------------------------------------------------------------------------------------------------------------------------------------------------------------------------------------------------------------------------------------------------------------------------------------------------------------------------------------------------------------------------------------|
| #1  | 'esophagus hemorrhage'/exp OR 'gastrointestinal hemorrhage'/exp<br>gastric artery'/exp OR 'gastroepiploic artery'/exp OR 'mesenteric artery'/exp OR 'rectal artery'/exp OR gastro\$intestin*:ab,ti OR \$esophag*:ab,ti OR gastric*:ab,ti OR gastritis:ab,ti OR stomach*:ab,ti OR duoden*:ab,ti OR gastro\$duoden*:ab,ti OR                                                                                           |
| #2  | intestin*:ab,ti OR jejunum:ab,ti OR jejunal:ab,ti OR ileum:ab,ti OR ileal:ab,ti OR coliti*:ab,ti OR enteroclit*:ab,ti OR colon*:ab,ti OR rectal:ab,ti OR rectum:ab,ti OR proctorrhag*:ab,ti OR proctitis:ab,ti OR rectocoli*:ab,ti OR rectitis:ab,ti OR rectorrhag*:ab,ti OR peptic*:ab,ti<br>hematemesis'/exp OR 'hematochezia'/exp OR bleed*:ab,ti OR 're-bleed*':ab,ti OR rebleed*:ab,ti OR 'blood flow':ab,ti OR |
| #3  | bloodflow:ab,ti OR h\$emorrhag*:ab,ti OR h\$ematemes*:ab,ti OR mel\$en*:ab,ti OR h\$ematoch*:ab,ti                                                                                                                                                                                                                                                                                                                   |
| #4  | #2 AND #3                                                                                                                                                                                                                                                                                                                                                                                                            |
| #5  | #1 OR #4                                                                                                                                                                                                                                                                                                                                                                                                             |
| #6  | 'aneurysm'/exp OR 'non-variceal':ab,ti OR nonvariceal:ab,ti OR arter*:ab,ti                                                                                                                                                                                                                                                                                                                                          |
| #7  | #5 AND #6                                                                                                                                                                                                                                                                                                                                                                                                            |
| #8  | artificial embolization'/exp OR embolization*:ab,ti OR embolisation*:ab,ti OR embolism*:ab,ti OR embolotherap*:ab,ti OR embolus*:ab,ti                                                                                                                                                                                                                                                                               |
| #9  | 'enbucrilate'/exp                                                                                                                                                                                                                                                                                                                                                                                                    |
| #10 | nbca:ab,ti OR 'n butyl 2 cyanoacrylate*':ab,ti OR 'n butyl cyanoacrylate*':ab,ti OR 'n-butylcyanoacrylate':ab,ti                                                                                                                                                                                                                                                                                                     |
| #11 | #9 AND #10                                                                                                                                                                                                                                                                                                                                                                                                           |
| #12 | 'embolization coil'/exp OR coil*:ab,ti OR microcoil*:ab,ti                                                                                                                                                                                                                                                                                                                                                           |
| #13 | #11 OR #12                                                                                                                                                                                                                                                                                                                                                                                                           |
| #14 | #7 AND #8 AND #13 AND 'human'/exp AND english:la AND [2000-2023]/py                                                                                                                                                                                                                                                                                                                                                  |



**Supplement Table S2. Primary analyses and sensitivity analyses of transcatheter arterial embolization for nonvariceal upper gastrointestinal bleeding.**

|                                 |                |                                        |
|---------------------------------|----------------|----------------------------------------|
| Clinical success rate           |                |                                        |
| Studies included                | No. of studies | Clinical success rate (95% CI)         |
| All articles                    | 8              | 73.0 (65.3–79.6)                       |
| Articles with at least 10 cases | 7              | 72.9 (64.1–80.2)                       |
| Technical success rate          |                |                                        |
| Studies included                | No. of studies | Technical success rate (95% CI)        |
| All articles                    | 21             | 94.9 (91.6–97.0)                       |
| Articles with at least 10 cases | 17             | 95.5 (91.7–97.6)                       |
| 30-day rebleeding rate          |                |                                        |
| Studies included                | No. of studies | 30-day rebleeding rate (95% CI)        |
| All articles                    | 10             | 25.0 (19.5–31.3)                       |
| Articles with at least 10 cases | 9              | 24.8 (19.0–31.7)                       |
| Major complication rate         |                |                                        |
| Studies included                | No. of studies | Major complication rate (95% CI)       |
| All articles                    | 13             | 3.5 (1.7–7.1)                          |
| Articles with at least 10 cases | 11             | 3.1 (1.3–6.9)                          |
| 30-day overall mortality rate   |                |                                        |
| Studies included                | No. of studies | 30-day overall mortality rate (95% CI) |
| All articles                    | 10             | 20.7 (13.2–31.1)                       |
| Articles with at least 10 cases | 9              | 20.7 (12.6–32.5)                       |

---

CI, confidence interval; No., number

**Supplement Table S3. Primary analyses and sensitivity analyses of transcatheter arterial embolization for nonvariceal lower gastrointestinal bleeding.**

|                                 |                |                                        |
|---------------------------------|----------------|----------------------------------------|
| Clinical success rate           |                |                                        |
| Studies included                | No. of studies | Clinical success rate (95% CI)         |
| All articles                    | 15             | 76.5 (70.5–81.5)                       |
| Articles with at least 10 cases | 9              | 75.7 (68.2–81.9)                       |
| Technical success rate          |                |                                        |
| Studies included                | No. of studies | Technical success rate (95% CI)        |
| All articles                    | 17             | 91.4 (87.7–94.0)                       |
| Articles with at least 10 cases | 11             | 91.9 (86.2–95.3)                       |
| 30-day rebleeding rate          |                |                                        |
| Studies included                | No. of studies | 30-day rebleeding rate (95% CI)        |
| All articles                    | 16             | 17.1 (13.4–21.6)                       |
| Articles with at least 10 cases | 10             | 17.6 (12.7–24.0)                       |
| Major complication rate         |                |                                        |
| Studies included                | No. of studies | Major complication rate (95% CI)       |
| All articles                    | 14             | 10.2 (7.2–13.8)                        |
| Articles with at least 10 cases | 7              | 10.3 (5.7–18.0)                        |
| 30-day overall mortality rate   |                |                                        |
| Studies included                | No. of studies | 30-day overall mortality rate (95% CI) |
| All articles                    | 12             | 11.5 (6.1–20.5)                        |
| Articles with at least 10 cases | 7              | 11.4 (3.8–29.4)                        |

---

CI, confidence interval; No., number



**Supplement Table S4. Sensitivity analyses of subgroup analyses of transcatheter arterial embolization for nonvariceal upper gastrointestinal bleeding.**

|                                       | Proportion (95% CI) | $I^2$ | $p_{\text{subgroup}}$ |
|---------------------------------------|---------------------|-------|-----------------------|
| Technical success rate (k = 17)       |                     |       | 0.054                 |
| Coils (k = 7)                         | 0.920 (0.761–0.977) | 52.2% |                       |
| NBCA (k = 10)                         | 0.972 (0.955–0.983) | 0%    |                       |
| 30-day rebleeding rate (k = 9)        |                     |       | 0.682                 |
| Coils (k = 2)                         | 0.227 (0.007–0.927) | 12.0% |                       |
| NBCA (k = 7)                          | 0.252 (0.179–0.345) | 42.0% |                       |
| Major complication rate (k = 11)      |                     |       | 0.178                 |
| Coils (k = 3)                         | 0.018 (0.007–0.047) | 0%    |                       |
| NBCA (k = 8)                          | 0.036 (0.012–0.106) | 68.6% |                       |
| 30-day overall mortality rate (k = 9) |                     |       | 0.104                 |
| Coils (k = 2)                         | 0.141 (0.003–0.914) | 0.9%  |                       |
| NBCA (k = 7)                          | 0.244 (0.146–0.378) | 50.7% |                       |

CI, confidence interval; NBCA, *n*-butyl cyanoacrylate

**Supplement Table S5. Sensitivity analyses of subgroup analyses of transcatheter arterial embolization for nonvariceal lower gastrointestinal bleeding.**

|                                       | Proportion (95% CI) | <i>I</i> <sup>2</sup> | <i>p</i> <sub>subgroup</sub> |
|---------------------------------------|---------------------|-----------------------|------------------------------|
| Clinical success rate (k =9)          |                     |                       | 0.820                        |
| Coils (k = 5)                         | 0.765 (0.610–0.872) | 7.1%                  |                              |
| NBCA (k = 4)                          | 0.751 (0.594–0.861) | 12.6%                 |                              |
| Technical success rate (k =11)        |                     |                       | <0.001                       |
| Coils (k = 8)                         | 0.893 (0.822–0.938) | 0.0%                  |                              |
| NBCA (k = 3)                          | 0.977 (0.949–0.990) | 0%                    |                              |
| 30-day rebleeding rate (k =10)        |                     |                       | 0.678                        |
| Coils (k = 6)                         | 0.187 (0.105–0.310) | 16.3%                 |                              |
| NBCA (k = 4)                          | 0.165 (0.08–0.303)  | 5.8%                  |                              |
| Major complication rate (k =7)        |                     |                       | 0.100                        |
| Coils (k = 4)                         | 0.049 (0.009–0.225) | 0%                    |                              |
| NBCA (k = 3)                          | 0.122 (0.044–0.297) | 0%                    |                              |
| 30-day overall mortality rate (k = 7) |                     |                       | 0.611                        |
| Coils (k = 4)                         | 0.092 (0.020–0.334) | 19.6%                 |                              |
| NBCA (k = 3)                          | 0.148 (0.003–0.900) | 80.3%                 |                              |

CI, confidence interval; NBCA, *n*-butyl cyanoacrylate

**Supplement Fig. S1.** Funnel plots of the pooled clinical success rates of transcatheter arterial embolization (TAE) for nonvariceal upper gastrointestinal bleeding (UGIB) and lower gastrointestinal bleeding (LGIB).

a. The funnel plot of the pooled clinical success rate of TAE for UGIB.

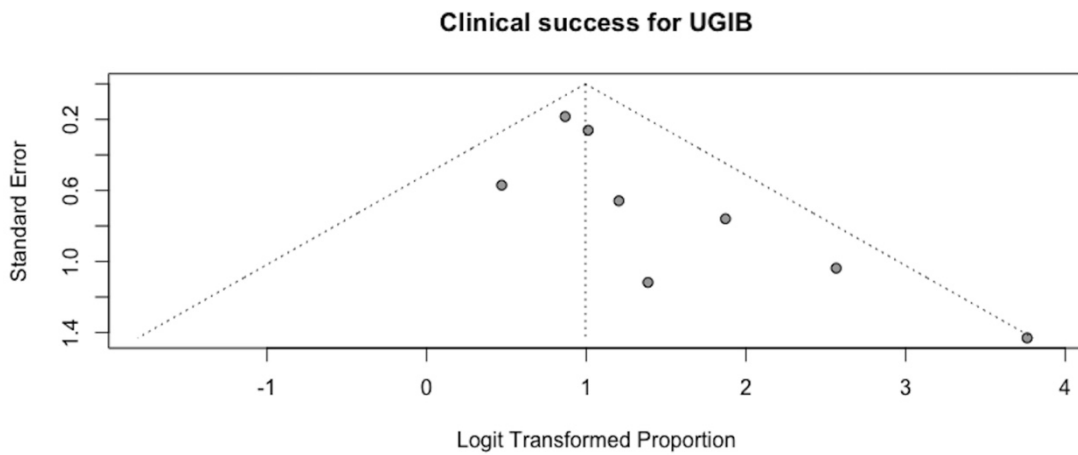

b. The funnel plot of the pooled clinical success rates of TAE for LGIB.

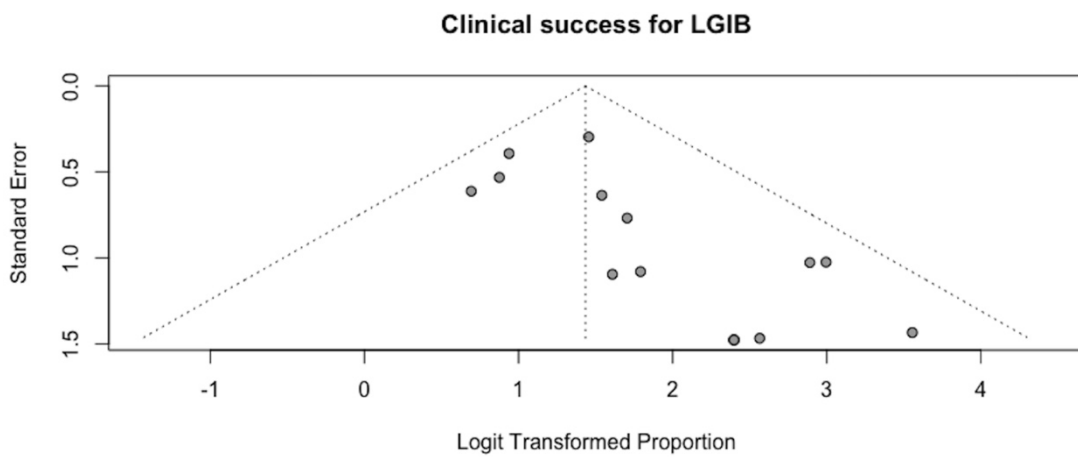

**Supplement Fig. S2.** Funnel plots of the pooled secondary outcomes of transcatheter arterial embolization (TAE) for nonvariceal upper gastrointestinal bleeding (UGIB) and lower gastrointestinal bleeding (LGIB).

a. The funnel plot of the pooled technical success rate of TAE for UGIB.

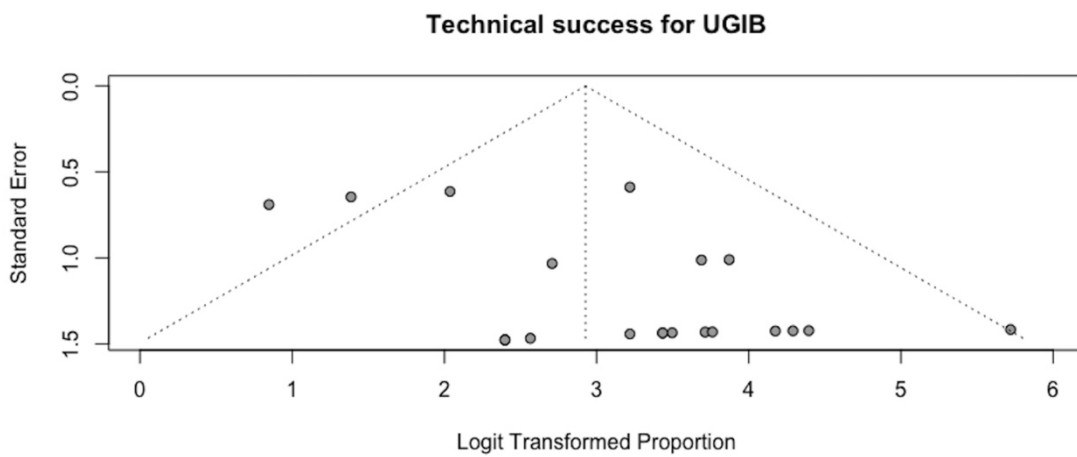

b. The funnel plot of the pooled technical success rate of TAE for LGIB.

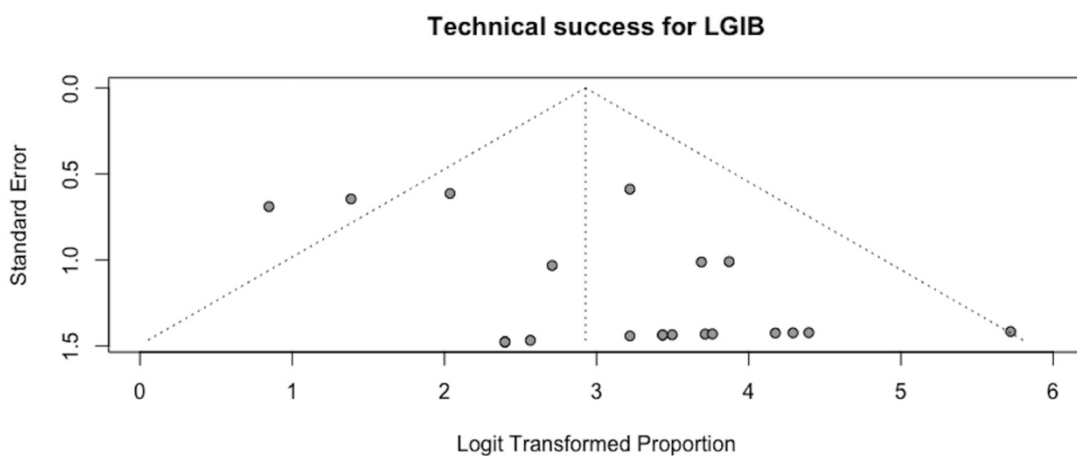

c. The funnel plot of the pooled 30-day rebleeding rate of TAE for UGIB.

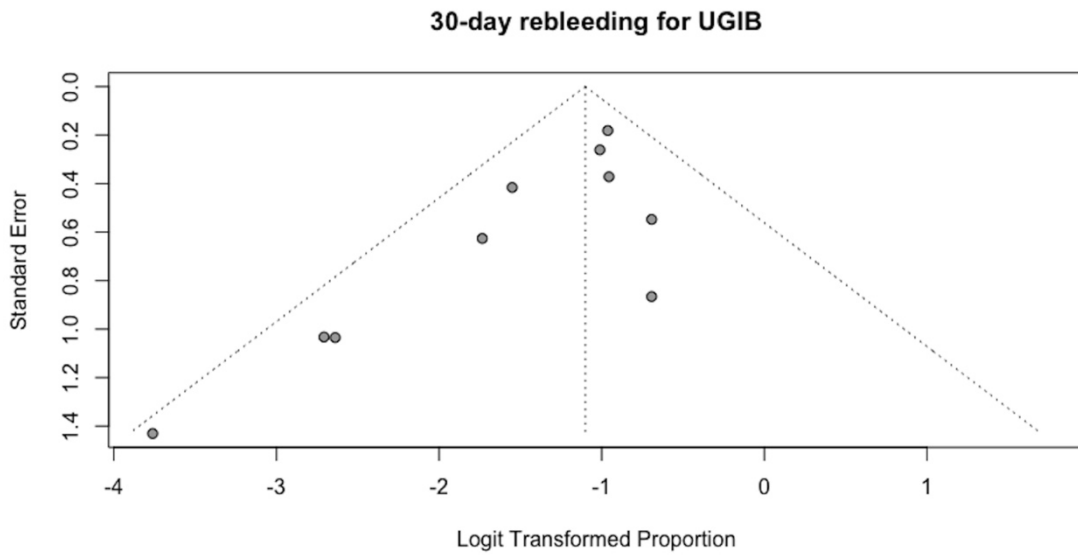

d. The funnel plot of the pooled 30-day rebleeding rate of TAE for LGIB.

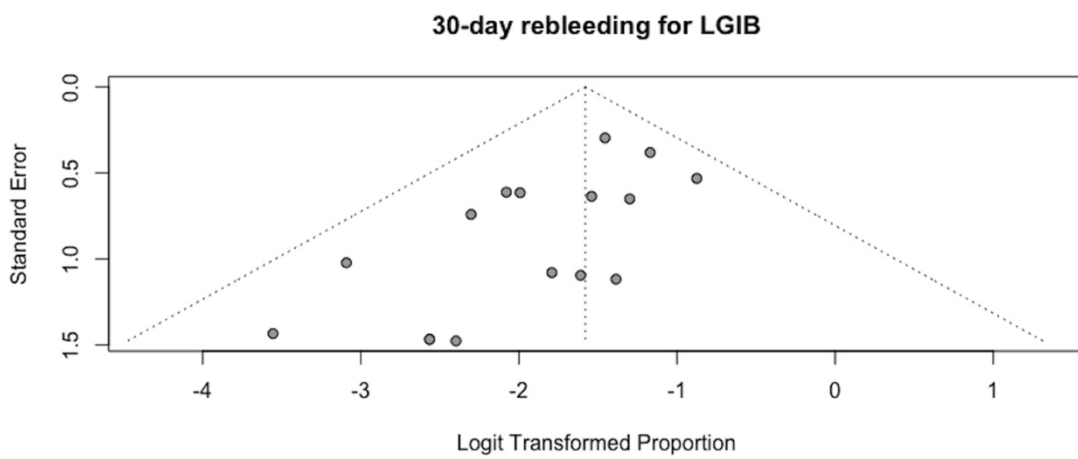

e. The funnel plot of the pooled major complication rate of TAE for UGIB.

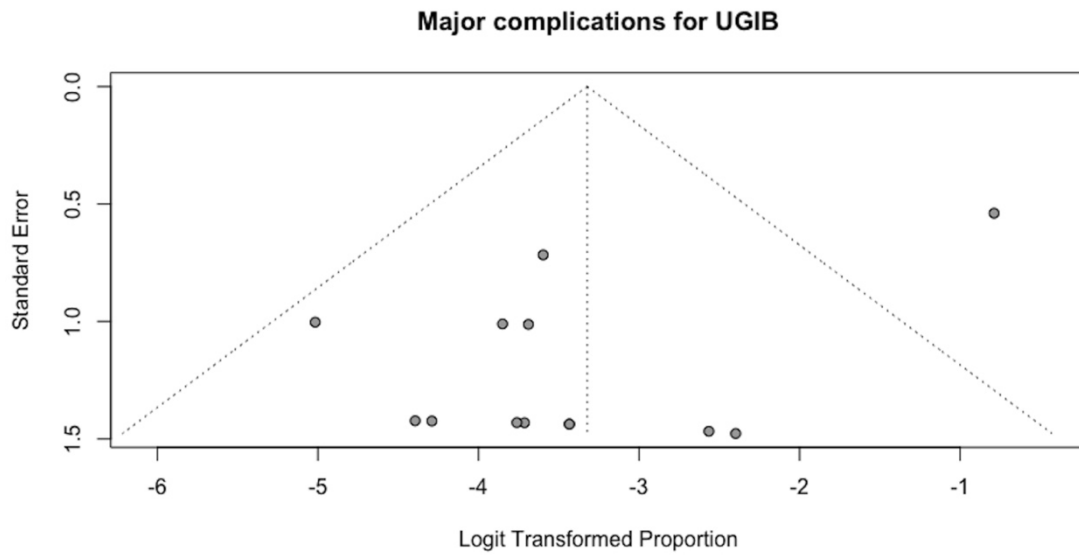

f. The funnel plot of the pooled major complication rate of TAE for LGIB.

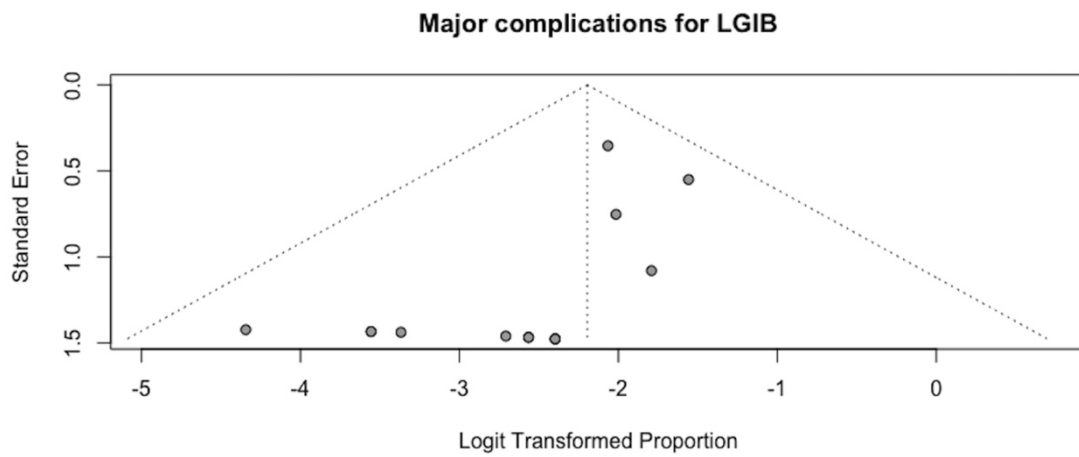

g. The funnel plot of the pooled 30-day overall mortality rate of TAE for UGIB.

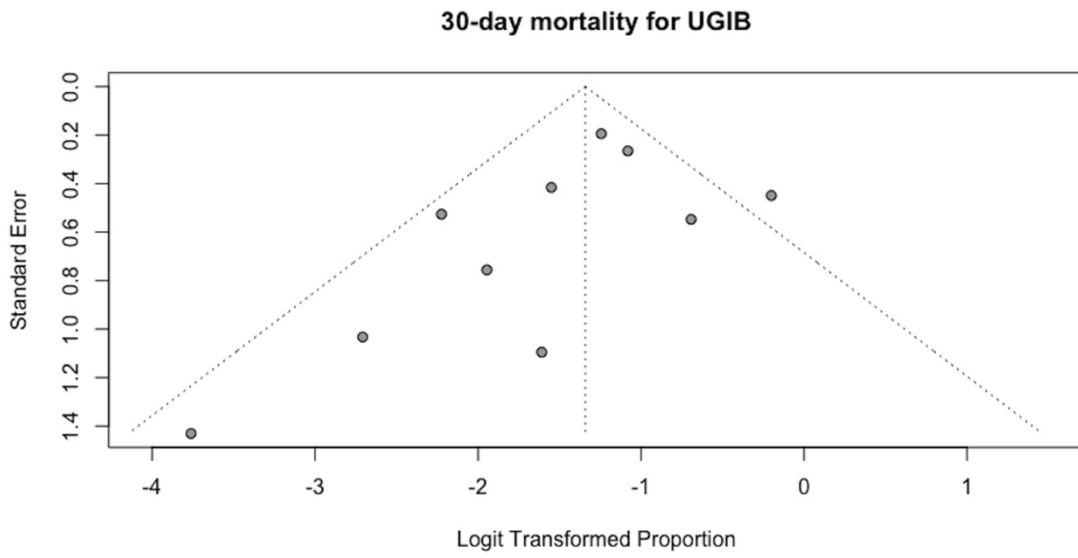

h. The funnel plot of the pooled 30-day overall mortality rate of TAE for LGIB.

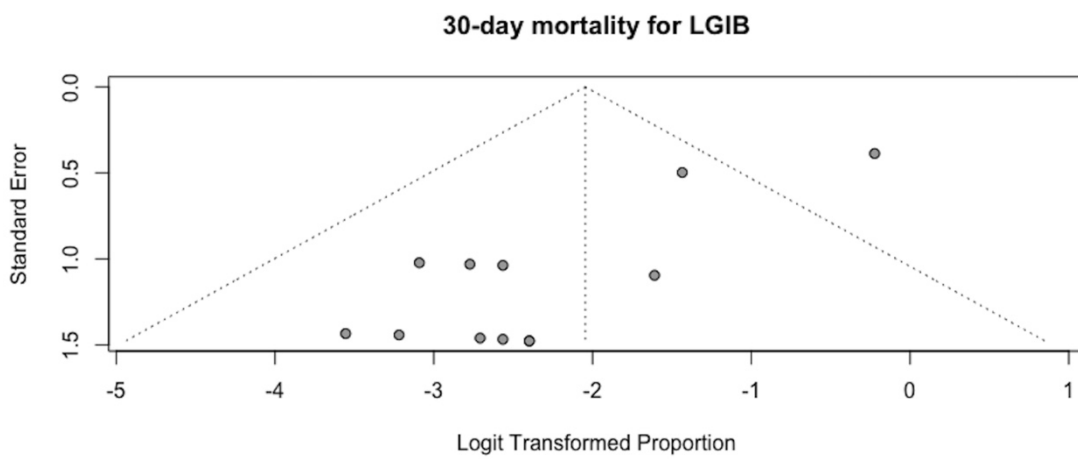

**Supplement Fig. S3.** Forest plots of the subgroup analyses of transcatheter arterial embolization (TAE) for nonvariceal upper gastrointestinal bleeding (UGIB).

a. The forest plot of the pooled technical success rate of TAE for UGIB with coils (C) and NBCA (N).

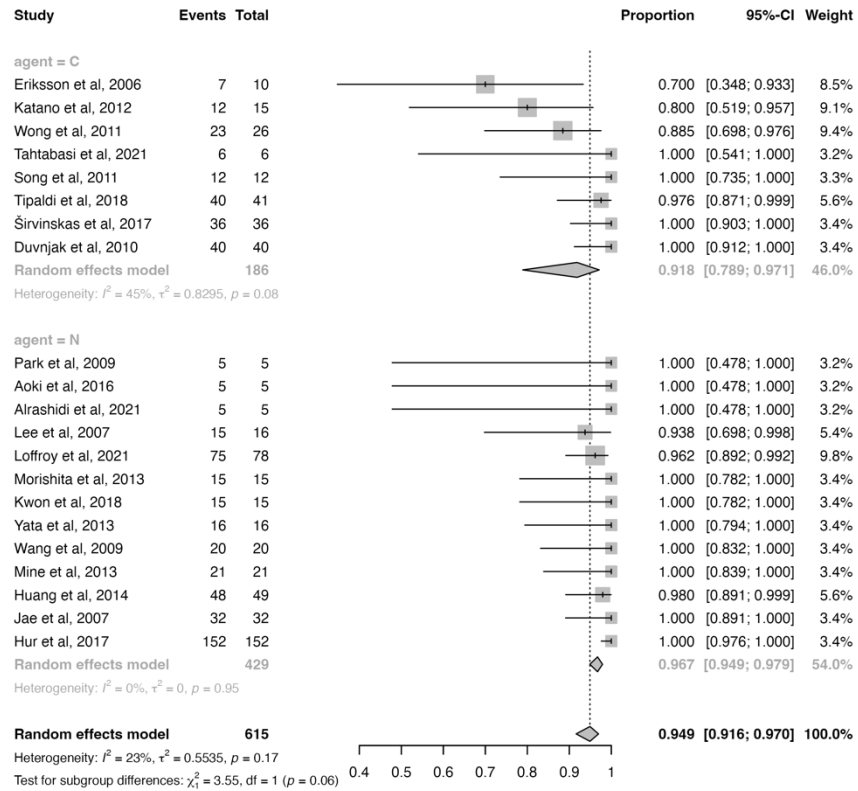



b. The forest plot of the pooled 30-day rebleeding rate of TAE for UGIB with coils (C) and NBCA (N).

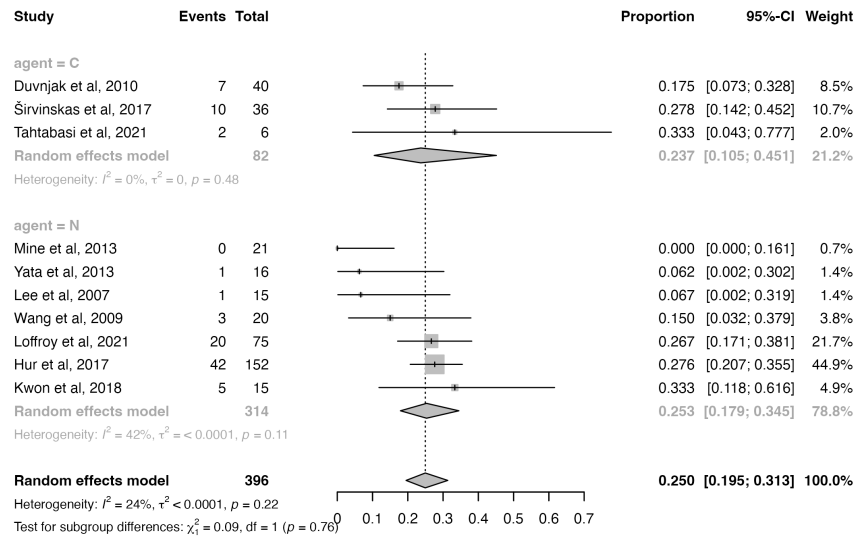

c. The forest plot of the pooled major complication rate of TAE for UGIB with coils (C) and NBCA (N).

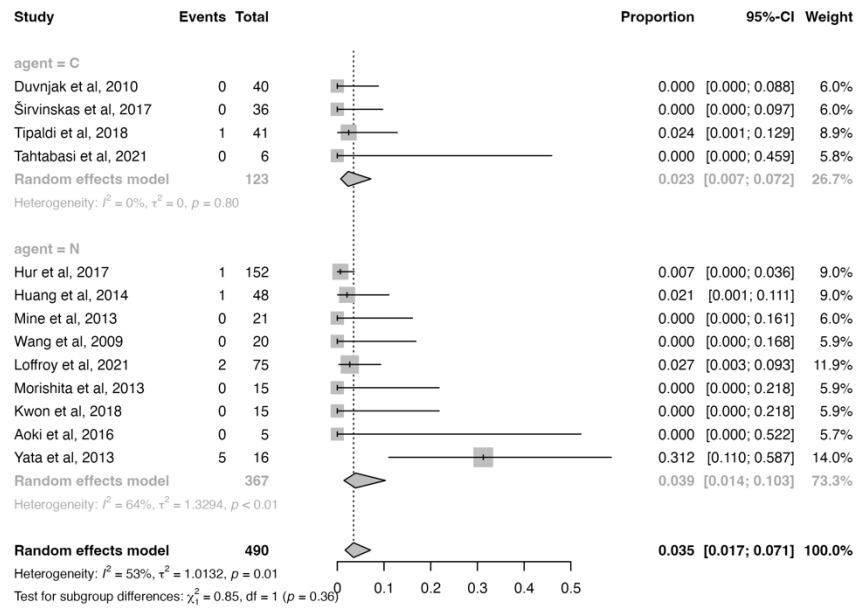

d. The forest plot of the pooled 30-day overall mortality rate of TAE for UGIB with coils (C) and NBCA (N).

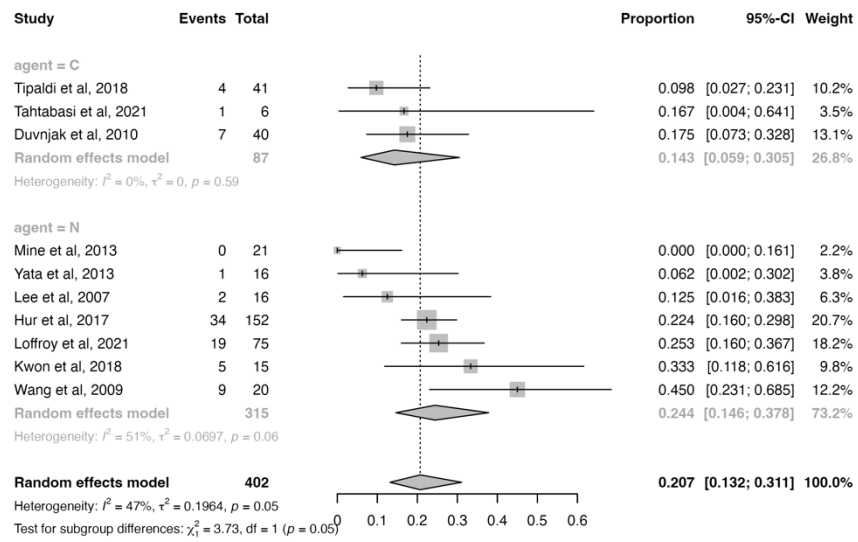

**Supplement Fig. S4.** Forest plots of the subgroup analyses of transcatheter arterial embolization (TAE) for nonvariceal lower gastrointestinal bleeding (LGIB).

a. The forest plot of the pooled clinical success rate of TAE for LGIB with coils (C) and NBCA (N).

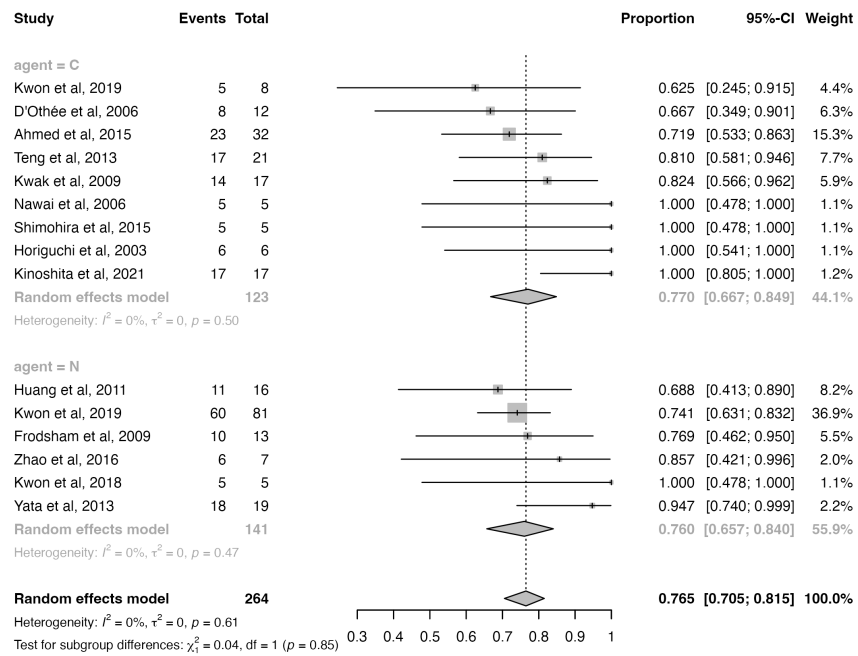

b. The forest plot of the pooled technical success rate of TAE for LGIB with coils (C) and NBCA (N).

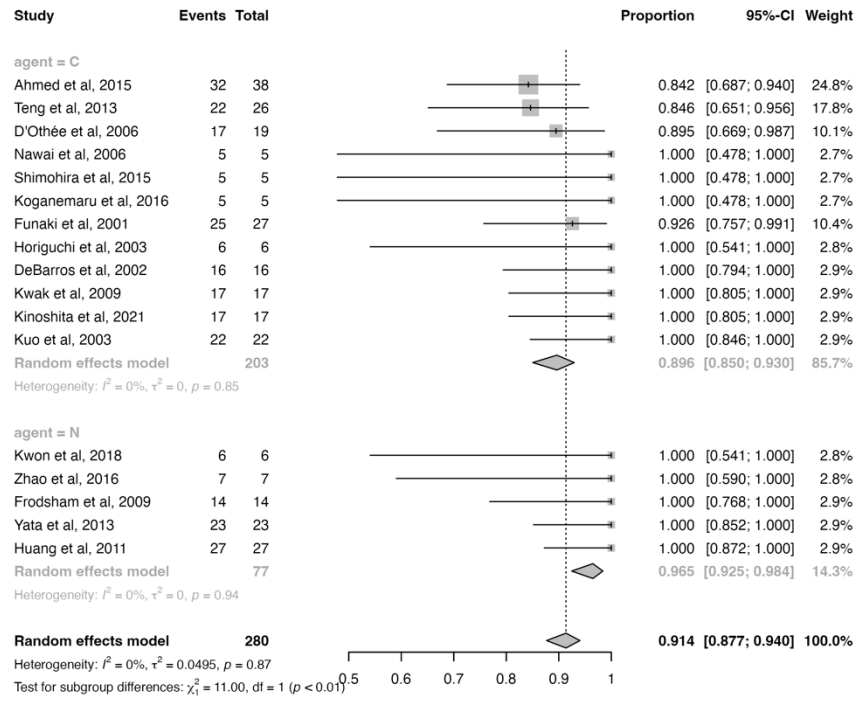

c. The forest plot of the pooled 30-day rebleeding rate of TAE for LGIB with coils (C) and NBCA (N).

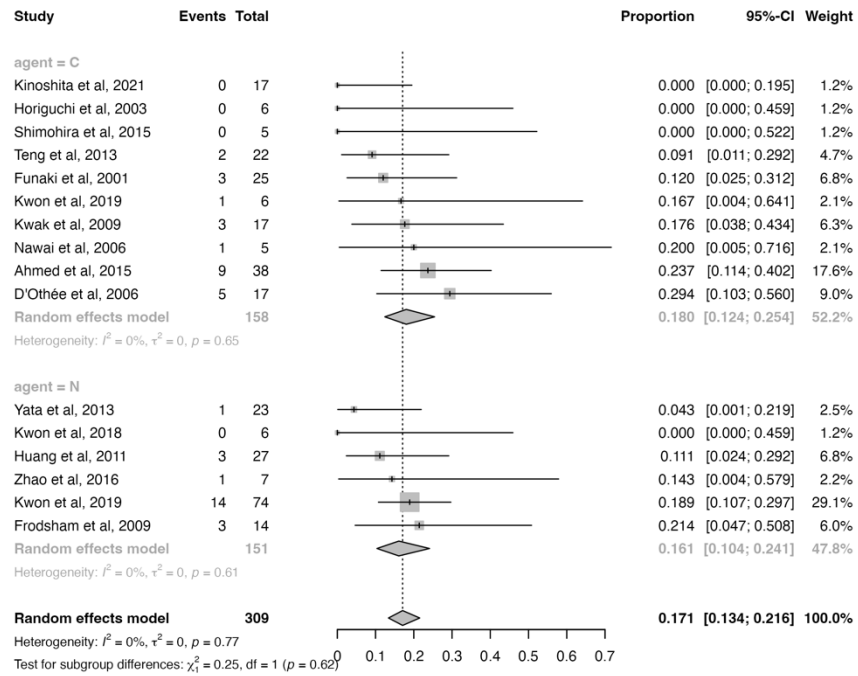

d. The forest plot of the pooled major complication rate of TAE for LGIB with coils (C) and NBCA (N).

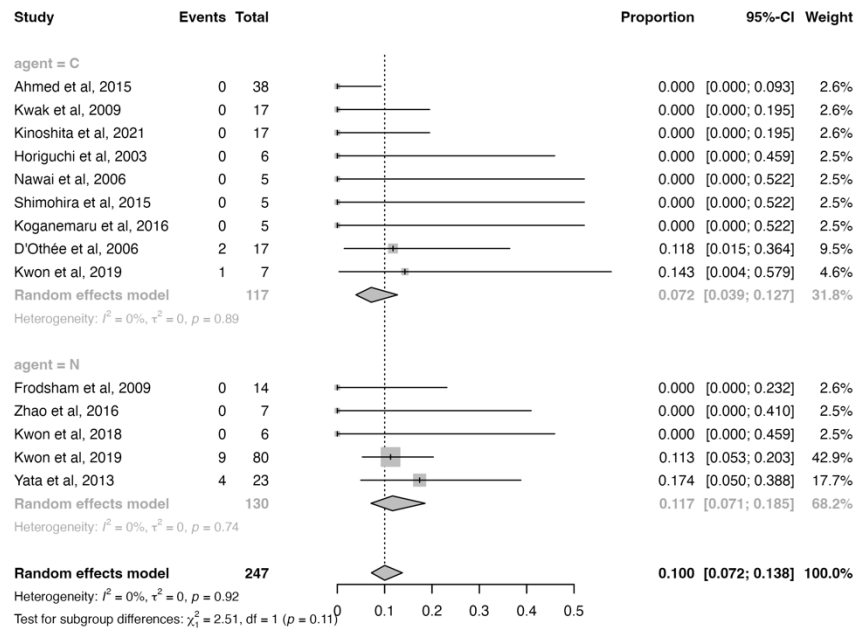

e. The forest plot of the pooled 30-day overall mortality rate of TAE for LGIB with coils (C) and NBCA (N).

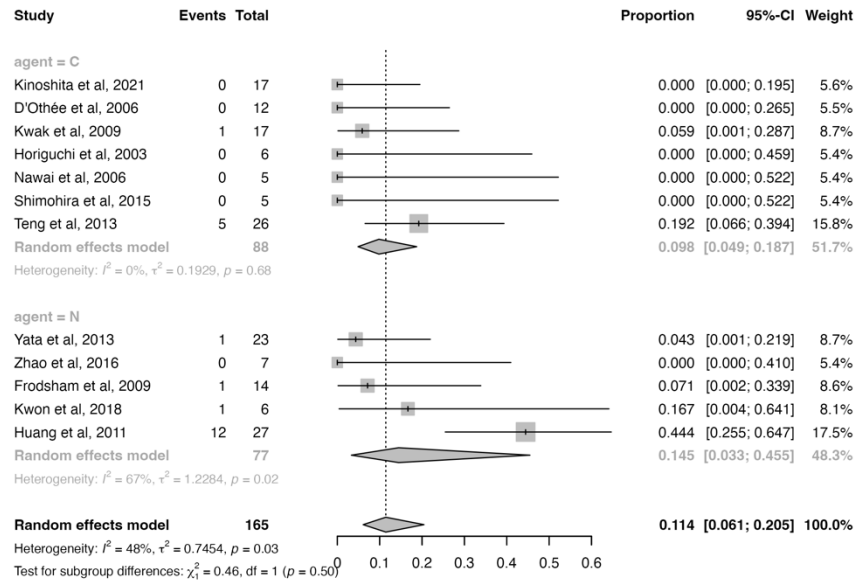

Supplement: 41598_2024_79133_MOESM1_ESM.pdf [file 41598_2024_79133_MOESM1_ESM.pdf]
